# Supplementary material for: The evolutionary position of nematodes
Source: Springer Nature journal article supplement (doi:10.1186/1471-2148-2-7), 2002-04-08
Supplement: Additional file 1 [file 1471-2148-2-7-s1.doc]

Supplemental Information to accompany paper by Jaime E. Blair et al. (S. B. Hedges, corr. Author): The Evolutionary Position of Nematodes.

**Table 1**. Proteins analyzed and bootstrap support for each alternative hypothesis.

|  |  |  | Four-Taxon Analysis | | | |  |  |  | Five-Taxon Analysis | | | |  |
| --- | --- | --- | --- | --- | --- | --- | --- | --- | --- | --- | --- | --- | --- | --- |
|  |  | Amino | Vert-Arth | *Lnem** | Bootstrap P | | |  | Amino | Vert-Arth | *Lnem** | Bootstrap P | | |
| Protein |  | acids | Distance |  | I | II | III |  | acids | Distance |  | I | II | III |
| 14-3-3 beta |  | 238 | 0.244 | 0.1143 | 33 | **65** | 2 |  | 140 | 0.277 | 0.116 | 12 | **86** | 0 |
| 26S Proteasome Regulatory subunit 6 |  | 389 | 0.124 | 0.1342 | **79** | 0 | 21 |  | 102 | 0.106 | 0.0743 | **55** | 0 | 23 |
| 3-HIB CoA Hydrolase |  | 343 | 0.816 | 0.3036 | **80** | 20 | 0 |  | 156 | 0.828 | 0.3679 | 8 | **82** | 0 |
| 3-Hydroxyisobutyrate Dehydrogenase |  | 295 | 0.883 | 0.4328 | 0 | 20 | **80** |  | 139 | 0.67 | 0.328 | 2 | 4 | **56** |
| 40S Ribosomal S19 |  | 141 | 0.49 | 0.4313 | 31 | **64** | 5 |  | 140 | 0.494 | 0.4326 | **37** | 36 | 3 |
| 40S ribosomal S2 |  | 257 | 0.177 | 0.1866 | **71** | 29 | 0 |  | 138 | 0.069 | 0.1006 | **45** | 9 | 1 |
| 40S ribosomal S3 |  | N/A |  |  |  |  |  |  | 160 | 0.13 | 0.1466 | 15 | **8** | 0 |
| 40S Ribosomal S3A |  | 254 | 0.382 | 0.2669 | **84** | 15 | 1 |  | 135 | 0.477 | 0.2734 | **71** | 0 | 0 |
| 40S Ribosomal S5 |  | 204 | 0.153 | 0.1292 | **69** | 0 | 31 |  | 160 | 0.138 | 0.13 | **50** | 2 | 33 |
| 60S Ribosomal L10 |  | 214 | 0.278 | 0.2018 | **77** | 23 | 0 |  | 120 | 0.18 | 0.1427 | **74** | 0 | 0 |
| 60S Ribosomal L18 |  | 186 | 0.392 | 0.2466 | 6 | **87** | 7 |  | 121 | 0.524 | 0.2857 | 7 | **64** | 8 |
| 60S Ribosomal L19 |  | 196 | 0.309 | 0.3256 | 44 | 7 | **49** |  | 109 | 0.306 | 0.24 | 3 | 4 | **12** |
| 60S Ribosomal L7 |  | 244 | 0.669 | 0.3106 | 5 | **95** | 0 |  | 148 | 0.703 | 0.4469 | 18 | **29** | 4 |
| 60S Ribosomal L8 |  | 256 | 0.252 | 0.1706 | **89** | 5 | 6 |  | 152 | 0.251 | 0.2151 | **68** | 25 | 0 |
| 60S Ribosomal P0 |  | 311 | 0.411 | 0.2418 | 8 | 31 | **61** |  | 113 | 0.228 | 0.2612 | 15 | 2 | **74** |
| AAA-ATPase Related protein |  | 777 | 0.586 | 0.3375 | **100** | 0 | 0 |  | 163 | 0.662 | 0.4568 | 4 | 7 | **8** |
| ABC Transporter |  | 591 | 0.375 | 0.2948 | 47 | **52** | 1 |  | 120 | 0.677 | 0.5375 | 11 | 0 | **3** |
| Acetyl-CoA Acetyltransferase 1 |  | 406 | 0.476 | 0.3992 | **96** | 4 | 1 |  | 155 | 0.453 | 0.352 | **86** | 0 | 2 |
| Acyl-CoA Oxidase (pristanoyl) |  | 621 | 0.995 | 0.7301 | 44 | 8 | **48** |  | 151 | 0.714 | 0.647 | **88** | 2 | 9 |
| Adenylate Kinase |  | 184 | 0.86 | 0.2107 | 39 | **55** | 6 |  | 128 | 1.024 | 0.2145 | **38** | 10 | 2 |
| Alanyl-tRNA Sythetase - cytosolic |  | 936 | 0.536 | 0.3067 | **100** | 0 | 0 |  | N/A |  |  |  |  |  |
| Alcohol Dehydrogenase Class 3 |  | 374 | 0.376 | 0.2018 | 2 | **96** | 2 |  | N/A |  |  |  |  |  |
| Aldehyde Dehydrogenase |  | 506 | 0.642 | 0.2184 | 21 | **62** | 17 |  | 160 | 0.596 | 0.1842 | 4 | **52** | 32 |
| Alpha Adducin |  | N/A |  |  |  |  |  |  | 142 | 0.934 | 0.4964 | 5 | 18 | **41** |
| Alpha Galactosidase A |  | 358 | 0.894 | 0.4898 | **51** | 49 | 0 |  | 115 | 0.64 | 0.2935 | **7** | 9 | 0 |
| Amidophosphoribosyltransferase |  | 450 | 0.445 | 0.4695 | **100** | 0 | 0 |  | 137 | 0.554 | 0.5542 | **5** | 34 | 8 |
| Argonaute |  | 373 | 0.208 | 0.1853 | 24 | **43** | 33 |  | 153 | 0.187 | 0.1602 | 2 | 3 | **56** |
| Asparaginyl-tRNA Synthetase |  | 522 | 0.35 | 0.2438 | **100** | 0 | 0 |  | N/A |  |  |  |  |  |
| Aspartate Aminotransferase 2 |  | 413 | 0.516 | 0.2095 | 0 | **72** | 28 |  | 145 | 0.612 | 0.2134 | 3 | **28** | 6 |
| ATP-dep. RNA Helicase (DEAH 46) |  | 709 | 0.263 | 0.1895 | 12 | 0 | **88** |  | 162 | 0.144 | 0.166 | 0 | 0 | **20** |
| Beta Galactosidase |  | 540 | 0.988 | 0.5288 | **51** | 44 | 5 |  | 127 | 1.067 | 0.4528 | **75** | 0 | 0 |
| Calnexin |  | 517 | 0.768 | 0.5701 | **89** | 9 | 2 |  | 114 | 0.879 | 0.4783 | 25 | 9 | **17** |
| Calreticulin |  | 386 | 0.396 | 0.2304 | **98** | 0 | 2 |  | 147 | 0.188 | 0.2051 | **95** | 0 | 1 |
| Carnitine Palmitoyltransferase II |  | 584 | 0.925 | 0.4814 | **91** | 2 | 7 |  | 101 | 0.761 | 0.3673 | **60** | 2 | 2 |
| Carnitine/Acylcarnitine Translocase |  | 288 | 0.753 | 0.3553 | **52** | 4 | 44 |  | 129 | 0.696 | 0.376 | **16** | 0 | 0 |
| Catalase |  | 487 | 0.433 | 0.2018 | **97** | 3 | 0 |  | 148 | 0.352 | 0.1662 | 3 | **69** | 5 |
| Cathepsin B |  | 312 | 0.64 | 0.4447 | **82** | 18 | 0 |  | 108 | 0.502 | 0.4012 | **55** | 6 | 0 |
| Cathepsin D |  | 374 | 0.695 | 0.3476 | 33 | 3 | **64** |  | 155 | 0.507 | 0.3153 | **4** | 0 | 0 |
| Cathepsin L |  | 321 | 0.716 | 0.3687 | **90** | 2 | 8 |  | 153 | 0.915 | 0.5615 | 6 | 15 | **3** |
| Cell Division Control 42 |  | 189 | 0.09 | 0.0458 | **100** | 0 | 0 |  | 151 | 0.062 | 0.063 | **80** | 14 | 2 |
| Ceramide Glycosyltransferase |  | 389 | 0.755 | 0.5888 | 33 | **67** | 0 |  | 134 | 0.621 | 0.4801 | 23 | **11** | 0 |
| Chromatin Assembly Factor CAF1 |  | N/A |  |  |  |  |  |  | 149 | 0.109 | 0.3055 | **91** | 0 | 0 |
| Clathrin Heavy Chain |  | 1669 | 0.236 | 0.2149 | **100** | 0 | 0 |  | 128 | 0.129 | 0.067 | 0 | 0 | **16** |
| Coatomer beta subunit |  | 929 | 0.408 | 0.3764 | 34 | 26 | **40** |  | 145 | 0.445 | 0.3208 | 9 | **81** | 0 |
| Coronin 1C |  | 468 | 0.678 | 0.5525 | **51** | 49 | 0 |  | 153 | 0.426 | 0.4942 | 3 | **55** | 36 |
| Cyclin H |  | 261 | 1 | 0.8832 | **95** | 3 | 2 |  | N/A |  |  |  |  |  |
| Dihydrolipoamide S-Acetyltransferase |  | 488 | 0.751 | 0.3296 | 1 | **67** | 32 |  | 134 | 0.917 | 0.2708 | 4 | **60** | 16 |
| dnaJ-like HSP |  | 390 | 0.513 | 0.4695 | **95** | 4 | 1 |  | 151 | 0.234 | 0.2985 | **94** | 0 | 1 |
| EBNA2 Co-Activator (100 kD) |  | 827 | 0.774 | 0.4508 | 12 | **72** | 16 |  | 133 | 0.646 | 0.3215 | **5** | 34 | 0 |
| Elongation Factor 1 alpha |  | 449 | 0.157 | 0.098 | **85** | 7 | 8 |  | 141 | 0.059 | 0.0475 | 33 | **39** | 0 |
| Elongation Factor 1 gamma |  | 387 | 0.606 | 0.5732 | 14 | 34 | **52** |  | 120 | 0.677 | 0.8203 | 18 | **1** | 5 |
| Elongation Factor 2 |  | 837 | 0.229 | 0.0947 | **57** | 32 | 11 |  | 148 | 0.142 | 0.0562 | 18 | **58** | 11 |
| Enolase Alpha |  | 429 | 0.341 | 0.1409 | 15 | **69** | 16 |  | N/A |  |  |  |  |  |
| Enoyl-CoA Hydratase - peroxisomal |  | N/A |  |  |  |  |  |  | 137 | 0.86 | 0.6553 | **75** | 8 | 4 |
| F-Actin Capping Protein - alpha 2 |  | 277 | 0.545 | 0.436 | 28 | **56** | 16 |  | 148 | 0.711 | 0.5016 | 2 | **79** | 10 |
| Fatty Acid Desaturase |  | 317 | 0.537 | 0.4225 | **64** | 28 | 8 |  | 129 | 0.659 | 0.337 | **52** | 0 | 21 |
| FGAM Synthase |  | 1280 | 0.783 | 0.5116 | **67** | 22 | 11 |  | 139 | 0.514 | 0.2516 | 24 | **27** | 0 |
| Fructose-bisphosphate Aldolase A |  | 358 | 0.418 | 0.2443 | **68** | 20 | 12 |  | 143 | 0.27 | 0.2916 | 13 | **20** | 1 |
| G-3-P Dehydrogenase |  | 331 | 0.288 | 0.1403 | **56** | 14 | 30 |  | 142 | 0.395 | 0.1804 | **20** | 27 | 4 |
| GDP-Disassociation Inhibitor beta |  | 440 | 0.434 | 0.212 | 0 | **100** | 0 |  | 157 | 0.423 | 0.3697 | 1 | **58** | 15 |
| Glucose-6-Phosphate Dehydrogenase |  | N/A |  |  |  |  |  |  | 138 | 0.788 | 0.4496 | **49** | 11 | 7 |
| Glycogen Phosphorylase |  | 827 | 0.329 | 0.1909 | **98** | 1 | 1 |  | 160 | 0.236 | 0.1869 | **46** | 3 | 23 |
| Guanine nt-Binding Protein beta |  | 340 | 0.216 | 0.0429 | **50** | 48 | 2 |  | 123 | 0.229 | 0.0581 | 15 | **22** | 1 |
| Histone Acetyltransferase |  | 545 | 0.199 | 0.1198 | **99** | 1 | 0 |  | 118 | 0.173 | 0.1007 | **13** | 3 | 1 |
| Isocitrate Dehydrogenase Beta |  | N/A |  |  |  |  |  |  | 127 | 0.552 | 0.2799 | **42** | 6 | 29 |
| Karyopherin alpha 3 |  | 504 | 0.403 | 0.3115 | **63** | 21 | 16 |  | 161 | 0.5 | 0.4197 | **50** | 8 | 3 |
| Lysophospholipase I |  | 210 | 0.726 | 0.4858 | 34 | 1 | **65** |  | 141 | 0.923 | 0.4243 | **14** | 10 | 8 |
| Lysosomal Acid Phosphotase |  | 395 | 1.447 | 0.8696 | 14 | 40 | **46** |  | 123 | 0.864 | 0.5878 | 7 | **30** | 18 |
| Lysyl-tRNA Synthetase |  | 563 | 0.382 | 0.3396 | **86** | 4 | 10 |  | 154 | 0.588 | 0.5211 | **91** | 0 | 0 |
| Malate Dehydrogenase - cytosolic |  | 309 | 0.486 | 0.3112 | 12 | **88** | 0 |  | 138 | 0.398 | 0.2997 | **26** | 12 | 24 |
| MAP Kinase 3/erk1 |  | 365 | 0.296 | 0.1534 | **91** | 9 | 0 |  | 151 | 0.115 | 0.0885 | **95** | 0 | 5 |
| MAP Kinase Kinase 3 |  | 321 | 0.559 | 0.5009 | **79** | 14 | 7 |  | 123 | 0.544 | 0.448 | **50** | 0 | 9 |
| Methionine Adenosyltransferase |  | 376 | 0.36 | 0.1465 | 32 | **68** | 0 |  | 165 | 0.406 | 0.1375 | 12 | **84** | 0 |
| Na/Ca Exchanger 1 |  | 533 | 0.693 | 0.322 | 23 | 25 | **52** |  | 145 | 0.763 | 0.4247 | 2 | 42 | **47** |
| Nuclear Ribonucleoprotein A1 |  | 297 | 0.691 | 0.4532 | **94** | 3 | 3 |  | 153 | 0.622 | 0.3771 | **62** | 0 | 20 |
| Nucleolar GTPase |  | 559 | 0.726 | 0.482 | 36 | **64** | 0 |  | N/A |  |  |  |  |  |
| Oligosaccharyltransferase |  | 405 | 0.516 | 0.4428 | **85** | 3 | 12 |  | 155 | 0.515 | 0.5627 | 16 | 7 | **21** |
| Ornithine Decarboxylase 1 |  | 379 | 1.013 | 0.4989 | 0 | **95** | 5 |  | 153 | 1.194 | 0.5227 | 0 | **73** | 1 |
| Phenylalanyl-tRNA Synthetase beta |  | 581 | 0.53 | 0.3452 | 14 | 8 | **78** |  | 154 | 0.411 | 0.2862 | 28 | 3 | **33** |
| Phosphoenolpyruvate Carboxylase |  | 591 | 0.453 | 0.3512 | **95** | 0 | 5 |  | N/A |  |  |  |  |  |
| Phosphogluconate Dehydrogenase |  | 472 | 0.346 | 0.2326 | **57** | 3 | 40 |  | 159 | 0.312 | 0.2087 | 4 | 0 | **58** |
| Phosphoglycerate Kinase |  | 389 | 0.401 | 0.1456 | 31 | **62** | 7 |  | 148 | 0.363 | 0.1674 | 0 | **49** | 6 |
| Poly-A Binding Protein 1 |  | 587 | 0.533 | 0.3422 | **96** | 3 | 1 |  | 153 | 0.24 | 0.1059 | 40 | **19** | 1 |
| Proliferation Associated Protein |  | 369 | 0.696 | 0.5301 | 39 | **47** | 14 |  | 148 | 0.655 | 0.5395 | 20 | **46** | 1 |
| Proteasome Macropain Alpha 4 subunit |  | 247 | 0.349 | 0.2242 | **81** | 19 | 0 |  | 148 | 0.249 | 0.2226 | **32** | 10 | 0 |
| Proteasome Macropain Alpha 7 subunit |  | N/A |  |  |  |  |  |  | 104 | 0.295 | 0.2676 | 33 | **33** | 2 |
| Protein Phosphotase 1A alpha |  | 302 | 0.62 | 0.4349 | **96** | 0 | 4 |  | 142 | 0.585 | 0.3607 | **29** | 0 | 1 |
| PUR – alpha |  | 218 | 0.766 | 0.8401 | **57** | 42 | 1 |  | 136 | 0.73 | 0.8716 | 21 | **28** | 24 |
| RAB2 GTP-Binding Protein |  | 208 | 0.098 | 0.0456 | **82** | 9 | 9 |  | 129 | 0.032 | 0.0185 | 33 | 0 | **48** |
| RAD 23 Yeast Homolog |  | 314 | 0.865 | 0.7174 | **49** | 35 | 16 |  | 131 | 1.205 | 0.7024 | **68** | 22 | 7 |
| RAN |  | 215 | 0.139 | 0.0495 | **99** | 0 | 1 |  | 164 | 0.091 | 0.0296 | **57** | 6 | 2 |
| Ribonucleoprotein Antigen U1 |  | 313 | 0.73 | 0.5345 | 4 | **89** | 7 |  | 157 | 0.469 | 0.4042 | 25 | **53** | 1 |
| RNA Helicase (DEAH 19) |  | 459 | 0.647 | 0.4985 | **88** | 2 | 10 |  | 126 | 0.421 | 0.3228 | **97** | 0 | 0 |
| RNA Polymerase II large subunit |  | 1803 | 0.311 | 0.2021 | **98** | 2 | 0 |  | N/A |  |  |  |  |  |
| S-Adenosylmethionine Decarboxylase |  | 325 | 0.824 | 0.5172 | **97** | 3 | 0 |  | 141 | 0.639 | 0.402 | **95** | 0 | 0 |
| SEC61 |  | 416 | 0.104 | 0.0587 | **51** | 49 | 0 |  | 150 | 0.149 | 0.0642 | 41 | **49** | 6 |
| Ser/Thr Protein Phosphotase 2A |  | 580 | 0.309 | 0.3963 | **82** | 2 | 16 |  | 148 | 0.203 | 0.1449 | 14 | 20 | **42** |
| Ser/Thr Protein Phosphotase 4 |  | 304 | 0.084 | 0.1562 | **100** | 0 | 0 |  | 147 | 0.049 | 0.1372 | **75** | 8 | 0 |
| Serine Hydroxymethyltransferase |  | 459 | 0.584 | 0.2673 | 30 | **67** | 3 |  | 132 | 0.345 | 0.1816 | **63** | 8 | 22 |
| Signal Recognition Particle 54kD |  | 485 | 0.278 | 0.1934 | **94** | 3 | 3 |  | 139 | 0.29 | 0.2284 | **69** | 2 | 8 |
| STE-20 like Kinase |  | 418 | 0.581 | 0.4108 | 33 | **61** | 6 |  | 156 | 0.709 | 0.4409 | 8 | **50** | 4 |
| Succinate Dehydrogenase Ip subunit |  | 266 | 0.373 | 0.2929 | **83** | 11 | 6 |  | 140 | 0.441 | 0.2421 | **65** | 6 | 1 |
| Syntaxin |  | 287 | 0.384 | 0.1218 | **95** | 1 | 4 |  | N/A |  |  |  |  |  |
| T Complex gamma subunit |  | 530 | 0.378 | 0.3324 | **58** | 29 | 13 |  | N/A |  |  |  |  |  |
| T Complex zeta subunit |  | N/A |  |  |  |  |  |  | 97 | 0.305 | 0.1635 | 4 | 18 | **1** |
| Uridine Kinase |  | 485 | 0.51 | 0.4751 | 29 | 31 | **40** |  | 157 | 0.702 | 0.4034 | **17** | 4 | 2 |
| Vacuolar ATPase C subunit |  | 338 | 0.446 | 0.3562 | **74** | 22 | 4 |  | 158 | 0.404 | 0.3417 | **48** | 7 | 4 |
| Vacuolar ATPase D subunit |  | 246 | 0.378 | 0.2347 | **59** | 3 | 38 |  | 153 | 0.213 | 0.2281 | **54** | 0 | 39 |
| Vacuolar ATPase E subunit |  | N/A |  |  |  |  |  |  | 141 | 0.49 | 0.2817 | **37** | 10 | 32 |
| Zinc Finger Protein ZPR1 |  | N/A |  |  |  |  |  |  | 138 | 0.66 | 0.7272 | **77** | 5 | 0 |
| * Nematode Branch Length (L), bold values indicate the best supported topology | | | | | | |  |  |  |  |  |  |  |  |
|  Bootstrap values do not sum to 100 in 5-taxon analysis because the additional node was not considered here. | | | | | | | | | | |  |  |  |  |
